# Supplementary material for: Hammerhead flatworms (Platyhelminthes, Geoplanidae, Bipaliinae): mitochondrial genomes and description of two new species from France, Italy, and Mayotte
Source: PeerJ journal article supplement (doi:10.7717/peerj.12725), 2022-02-01
Supplement: REVISED_NEW_Supplemental_File_1_details_about_specimens.pdf [file REVISED_NEW_Supplemental_File_1_details_about_specimens.pdf]

## Supplemental File

### Specimens of *Humbertium covidum* examined for the present study.

A total of 30 specimens were examined.

Geographic origin of specimens :

SP: Saint-Pée-sur-Nivelle, Pyrénées Atlantiques, France

BI: Billère, Pyrénées Atlantiques, France

CA: Casier, Treviso, Italy.

In addition, several specimens from Billère (similar to JL343), and several specimens from Casier (similar to JL351) were shipped to Pierre Gros, photographed alive by him, then destroyed. A specimen (similar to JL351) was filmed alive *in situ* by Enrico Ruzzier.

| Specimen | Locality | Status   | State           | cox1       | 28S      | 18S      | Mitogenome | Slides |
|----------|----------|----------|-----------------|------------|----------|----------|------------|--------|
| JL090A   | SP       | Voucher  | Damaged (mol.)  | MG655588   |          |          |            |        |
| JL090B   | SP       | Voucher  | Destroyed       | MZ561471 * | MZ520989 | MZ520996 | MZ561471   |        |
| JL090C   | SP       | Voucher  | Untouched       |            |          |          |            |        |
| JL090D   | SP       | Voucher  | Untouched       |            |          |          |            |        |
| JL090E   | SP       | Voucher  | Untouched       |            |          |          |            |        |
| JL090F   | SP       | Voucher  | Untouched       |            |          |          |            |        |
| JL343    | BI       | Voucher  | Damaged (mol.)  | MZ622153   |          |          |            |        |
| JL351A   | CA       | Paratype | Damaged (hist.) |            |          |          |            | 34     |
| JL351B   | CA       | Holotype | Damaged (hist.) |            |          |          |            | 36     |
| JL351C   | CA       | Paratype | Untouched       |            |          |          |            |        |
| JL351D   | CA       | Paratype | Untouched       |            |          |          |            |        |
| JL351E   | CA       | Paratype | Untouched       |            |          |          |            |        |
| JL351F   | CA       | Paratype | Untouched       |            |          |          |            |        |
| JL351G   | CA       | Paratype | Untouched       |            |          |          |            |        |
| JL351H   | CA       | Paratype | Damaged (mol.)  | MZ622148   |          |          |            |        |
| JL351J   | CA       | Paratype | Damaged (mol.)  | MZ622149   |          |          |            |        |
| JL351K   | CA       | Paratype | Damaged (mol.)  | MZ622150   | MZ647546 |          |            |        |
| JL351L   | CA       | Paratype | Damaged (mol.)  | MZ622151   | MZ647547 |          |            |        |
| JL351M   | CA       | Paratype | Damaged (mol.)  | MZ622152   | MZ647548 |          |            |        |
| JL351N   | CA       | Paratype | Destroyed       | MZ561472 * | MZ520988 | MZ520995 | MZ561472   |        |
| JL351P   | CA       | Paratype | Destroyed       |            |          |          |            |        |
| JL351Q   | CA       | Paratype | Untouched       |            |          |          |            |        |
| JL351R   | CA       | Paratype | Untouched       |            |          |          |            |        |
| JL351S   | CA       | Paratype | Untouched       |            |          |          |            |        |
| JL351T   | CA       | Paratype | Untouched       |            |          |          |            |        |
| JL351U   | CA       | Paratype | Untouched       |            |          |          |            |        |
| JL351V   | CA       | Paratype | Untouched       |            |          |          |            |        |
| JL351W   | CA       | Paratype | Untouched       |            |          |          |            |        |
| JL351X   | CA       | Paratype | Untouched       |            |          |          |            |        |
| JL351Y   | CA       | Paratype | Untouched       |            |          |          |            |        |

\* a reminder that the *cox1* sequence is included in the corresponding mitogenome sequence

Damaged (mol.): a small part (about 1mm<sup>3</sup>) was taken from the specimen.

Damaged (hist.): the specimen was processed for histology.

Destroyed: the whole specimen was used for molecular analysis.

**Specimens of *Diversibipalium mayottensis* examined for the present study.**

A total of 7 specimens.

All specimens collected by Laurent Charles in Mayotte.

In addition, one photograph was received of another specimen, not collected (see Justine et al., 2018, Figure 22, photo by Benoît Duperron).

| Specimen | Locality  | Status   | State                         | cox1                     | 28S      | 18S      | Mitogenome | Photos        |
|----------|-----------|----------|-------------------------------|--------------------------|----------|----------|------------|---------------|
| JL282    | Ouangani  | Holotype | Damaged (mol.)                | MG655598                 |          |          |            | Figures 24-25 |
| JL280    | Mtsamboro | Paratype | Regenerating + damaged (mol.) | MG655596                 |          |          |            | Figures 26-27 |
| JL281A   | Mtsamboro | Paratype | Highly damaged (mol.)         | MG655597 §<br>MZ561470 * | MZ520986 | MZ520997 | MZ561470   |               |
| JL281B   | Mtsamboro | Paratype | Damaged (mol.)                | MG655597 §               |          |          |            |               |
| JL281C   | Mtsamboro | Paratype | Damaged (mol.)                | MG655597 §               |          |          |            |               |
| JL283    | Mamoudzou | Paratype | No head visible               |                          |          |          |            |               |
| JL284    | Mtsamboro | Paratype | Damaged (mol.)                | MG655599                 |          |          |            |               |

\* a reminder that the *cox1* sequence is included in corresponding mitogenome sequence

§ sequence MG655597: one sequence deposited in GenBank, based on 3 identical replicates from specimens JL281A, JL281B, JL281C

Damaged (mol.) : a small part (about 1mm<sup>3</sup>) was taken from the specimen.

Highly damaged (mol.): most of body destroyed, only head remaining.
